# Supplementary material
Source: Springer Nature journal article supplement (https://www.springermedizin.de/resource/supplementary/12906_2013_2139_MOESM19_ESM.pdf/9522136)

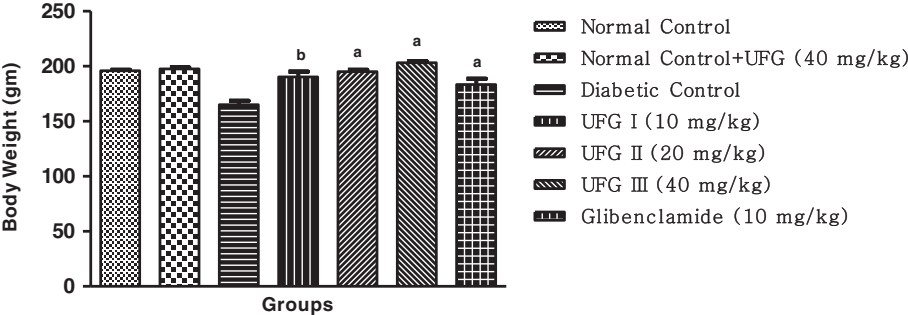

Supplement: MOESM19 [file 9522136]
